1 **Biological and cultural drivers of oral**  
2 **microbiota in Medieval and Post-Medieval**  
3 **London, UK**

4  
5 A. G. Farrer<sup>1\*</sup>, J. Bekvalac<sup>2</sup>, R. Redfern<sup>2</sup>, N. Gully<sup>3</sup>, K. Dobney<sup>4,5,6</sup>, A. Cooper<sup>1+</sup>, and  
6 L. S. Weyrich<sup>1+</sup>

7  
8 Affiliations:

9 <sup>1</sup>Australian Centre for Ancient DNA, School of Biological Sciences, University of  
10 Adelaide, Adelaide, South Australia, Australia

11 <sup>2</sup>Centre for Human Bioarchaeology, Museum of London, London, United Kingdom

12 <sup>3</sup>School of Dentistry, Faculty of Health Sciences, University of Adelaide, Adelaide,  
13 South Australia, Australia

14 <sup>4</sup>Department of Archaeology, Classics and Egyptology, School of Histories,  
15 Languages and Cultures, University of Liverpool, Liverpool, United Kingdom

16 <sup>5</sup>Department of Archaeology, University of Aberdeen, Aberdeen, United Kingdom

17 <sup>6</sup>Department of Archaeology, Simon Fraser University, Burnaby, Canada

18 <sup>+</sup>These authors contributed equally to this work

19  
20 Corresponding author:

21 [andrew.farrer@adelaide.edu.au](mailto:andrew.farrer@adelaide.edu.au)

22  
23 Key words: ancient DNA, dental calculus, microbiota, microbiome, Britain, London

## 24 Abstract

25           The trillions of microorganisms that live in association with the human body  
26 (microbiota) are critical for human health and disease, but there is a limited  
27 understanding of how cultural and environmental factors shaped our microbiota  
28 diversity through time. However, biomolecular remnants of the human oral  
29 microbiota - recovered from the calcified dental plaque (calculus) of our long-dead  
30 ancestors - are providing a new means of exploring this key relationship of our  
31 evolutionary history. Here, we correlate extensive experimental, archaeological, and  
32 biological metadata with 128 ancient dental calculus specimens from Medieval and  
33 Post-Medieval London, UK (1066 – 1853 CE). We identify a significant association  
34 between microbiota and oral geography (*i.e.* tooth type and tooth surface), which has  
35 confounded ancient microbiota studies to date. By controlling for oral geography,  
36 however, we identify the first associations between ancient microbiota and cultural  
37 and environmental signatures. We find significant links between ancient British  
38 microbiota structure and health, including skeletal markers of stress that may reflect  
39 low socioeconomic status. Furthermore, this study provides baseline data to explore  
40 factors that drive microbiota differentiation within and between ancient populations  
41 and highlights the potential of ancient microbiota to infer detailed health and socio-  
42 cultural information about the past.

## 43 Introduction

44 It is now widely recognized that microbial communities both on and in the  
45 human body (microbiota) fulfill key functional roles that include accessing nutrients  
46 otherwise inaccessible from food resources, removing dead epithelial cells, restoring  
47 tooth enamel, and interacting with the immune system (1–5). Conversely, many  
48 diseases have also been linked to alterations in microbiota composition and/or  
49 function, including oral disease, arthritis, respiratory disorders, cancer, obesity,  
50 mental disorders, and many more (6–10). While several studies have examined how  
51 modern commensal bacterial communities respond to changes in lifestyle, diet, and  
52 environment (11–13), we know almost nothing about their evolutionary history or  
53 how that history shaped our own bio-cultural identity.

54 Bioarchaeological remains contain key data from natural experiments run in  
55 the past that can reveal the history of the bacterial communities found in modern  
56 populations, including the effects of different living conditions, diet, and disease (14–  
57 17). The analysis of such data is now routinely possible using ancient DNA (aDNA)  
58 recovered from calcified dental plaque (calculus), which is widespread in the  
59 archaeological record (18). Dental calculus is a calcified microbial biofilm on the  
60 surface of the teeth (19). This matrix preserves human microbiota in real-time during  
61 the life of the individual, forming the only reliable record of its kind in the  
62 archaeological record (15,18,20–23). Bacterial DNA recovered from ancient dental  
63 calculus has already revealed major changes in human oral microbiota across the  
64 major human biocultural transitions of the Holocene/Anthropocene (~10,000 ybp and  
65 ~200 ybp, respectively) (18), as well as information on real-time pathogen evolution  
66 (22,23). Eukaryotic DNA recovered from ancient dental calculus has also revealed  
67 differences in diet between past populations (22,23). However, no detailed, long-  
68 term studies of ancient microbiota within a single human population through time  
69 exists and, as such, many cultural and environmental factors that shaped our ancient  
70 microbiota remain unknown.

71 In addition, several fundamental technical issues remain unresolved in ancient  
72 dental calculus research. For example, the influence of oral geography has not been  
73 assessed (*i.e.* if differences between the specific sampling location in the mouth  
74 significantly impact results). Microbial composition is known to vary between tooth  
75 surfaces in modern individuals (24), but this is yet to be explored in detail in studies

76 of ancient oral microbiota. In addition, recent studies of ancient dental calculus have  
77 been limited to very small sample sizes across large geographic ranges, likely  
78 limiting the ability to detect specific factors that shape ancient microbiota. Lastly,  
79 contamination control and detection is a critical issue, especially in samples with low  
80 levels of endogenous DNA (such as ancient dental calculus). In such samples,  
81 background or contaminant DNA from the laboratory can easily be high enough to  
82 drive signals (25). Filtering methods can be used to conservatively remove  
83 contaminant species (23); however, there is not currently an accepted systematic  
84 approach to wholly assess endogenous oral signal within dental calculus. Such  
85 unresolved issues might easily provide false positive results or confound real  
86 historical patterns, and these issues will become more important as studies seek to  
87 increase resolution.

88         Here, we examine the largest number of ancient dental calculus samples  
89 studied to date – from 128 Medieval and Post-Medieval Londoners [1066 – 1853].  
90 We focused on a single city in order to remove geographic variation and to explore  
91 the localised cultural and environmental factors and how they shaped the British oral  
92 microbiota. The dental calculus samples utilized for this study are part of the  
93 Museum of London’s (MoL) human osteology collections, which include extensive,  
94 additional and detailed information about dating, paleopathology, and cultural  
95 context (*e.g.* age, sex, diet, location, oral health, and systemic disease). We go on to  
96 combine this extensive archaeological and biological metadata with detailed  
97 experimental information in order to explore whether tooth type and location in the  
98 oral cavity significantly bias the conclusions drawn.

## 99 **Methods**

### 100 *Ethics*

101 Research was conducted after approval from the Human Research Ethics  
102 Committee at the University of Adelaide (H-2012-108) following agreement to  
103 sample from the MoL Research Committee.

104

### 105 *Archaeological Context and Site Information*

106 160 samples were collected from nine archaeological sites in a 10-square  
107 mile section of London (16km<sup>2</sup>), which formed a continuous temporal sequence from  
108 1066 – 1853 CE (Figure 1; Table S1). The datasets included burial sites and  
109 cemeteries of monastic (Bermondsey Abbey, Spital Square, Merton Priory, St. Benet  
110 Sharehog, St. Mary Graces, and St. Brides) and laymen (Guildhall Yard), low class  
111 (Cross Bones), and upper class (Chelsea Old Church). All individuals were over 18  
112 years old and had extensive metadata collated in the MoL's Wellcome Osteological  
113 Research Database (WORD), including sex and age estimates, blood disorders,  
114 dental and vertebral anomalies and pathologies, and joint disease (Table S1).

115

### 116 *Sample collection*

117 All sampling was completed at the Museum of London using sterile  
118 procedures as previously published (14). Briefly, a facemask and gloves were worn  
119 to limit contamination from the researcher. The gloves were changed between each  
120 sample to limit cross-contamination. A sterile dental pick was used to remove the  
121 dental calculus deposit from a single surface of one tooth per skeleton. Pressure was  
122 applied in parallel to the tooth surface to ensure the enamel was not damaged.  
123 Calculus fragments were collected in sterile aluminum foil and placed into sterile  
124 plastic bags for transport to the aDNA facility at the Australian Centre for Ancient  
125 DNA, University of Adelaide, Australia.

126

### 127 *Sample decontamination, DNA extraction, shotgun library preparation, and* 128 *DNA sequencing*

129 All laboratory work was conducted in the specialized stand-alone aDNA  
130 facility at the Australian Centre for Ancient DNA at the University of Adelaide.  
131 Samples were processed in a random order to avoid bias. All calculus samples were

132 decontaminated with bleach and UV exposure, as described elsewhere (18). To  
133 recover preserved DNA, dry samples were powdered in a sterile tube, immediately  
134 following decontamination. A modified silica-based DNA extraction was used on all  
135 samples (23). The total volumes of lysis and DNA binding buffers were modified to  
136 account for the small sample size: 1.7 mL lysis buffer (1.6 mL 0.5 M EDTA (0.5M);  
137 100  $\mu$ L SDS (10 %); and 20  $\mu$ L proteinase K (20mg/ml)) and 3 mL guanidinium DNA  
138 binding buffer. Negative extraction blank controls were included at a ratio of 1:7,  
139 control per calculus samples. Next, shotgun libraries were generated without  
140 enzymatic damage repair (23). Briefly, 20  $\mu$ L of DNA extract was prepared by  
141 enzymatic polishing to produce blunt ended fragments prior to ligation of truncated  
142 barcoded Illumina adaptors. To maintain sequence complexity, each sample was  
143 amplified in triplicate using 13 cycles with HiFi Taq polymerase and full length  
144 indexed Illumina adaptors (26). The resulting triplicate amplifications were pooled  
145 and purified with the Agencourt AMPure XP system. All samples were then pooled,  
146 purified, and then quantified using a TapeStation (Agilent) and quantitative PCR  
147 (KAPA Illumina quantification kit) to create a 2 nM sequencing library. In total, 128 of  
148 the 161 (79.5%) dental calculus samples yielded high-quality DNA libraries that were  
149 sequenced using a high output 2 x 150 bp kit on the Illumina NextSeq.

150

### 151 *Bioinformatic analysis and quality filtering*

152 To identify the microbial communities preserved within samples, raw FastQ  
153 files were demultiplexed using sabre (<https://github.com/najoshi/sabre>). Bbmerge  
154 (<http://sourceforge.net/projects/bbmap/>) was used to merge reads (5 bp overlap),  
155 and AdapterRemoval (27) was applied to identify and remove the 5' and 3' barcode  
156 and adaptor sequences. Reads greater than 300 bp were discarded, as they likely  
157 represent modern contamination (15). Microbial species were identified using  
158 MALTX (23,28) against the NCBI nr database (2014), and the resulting information  
159 was uploaded and filtered using default LCA parameters in MEGAN5 (29). The  
160 identified reads within the samples were then normalized to 129,760 sequences,  
161 which was the lowest number of reads observed in any sample. Lastly, laboratory  
162 contaminant signal was removed from all samples by filtering any contaminant  
163 species observed in the negative controls from the calculus samples, as previously

164 described (23). 464 contaminant taxa (26.4% of all species level identifications) were  
165 removed from the overall dataset.

166

### 167 *Statistical analysis of associated metadata*

168 The oral geography of the samples and the workflow metadata were  
169 compared to the microbiota to assess the potential impact of oral geography and  
170 sample handling. All sequence reads that could be assigned to organisms for each  
171 sample were exported from MEGAN5 and transformed for use in QIIME (V1.8) (30).  
172 PERMANOVA tests (anosim; 9,999 permutations) were used to correlate oral  
173 sampling location (e.g. upper or lower jaw, tooth type, and tooth surface), sample  
174 information (i.e. fragment size and sub- or supra-gingival), and processing details  
175 (i.e. date of sampling, extraction, sequencing) with the Bray-Curtis matrix (Table S2).  
176 Following this analysis, samples were filtered based on tooth type, tooth surface, and  
177 sub- or supragingival calculus. The three largest datasets were taken forward for  
178 further analysis: Molar, Lingual/Palatal, Supragingival (n = 36); Premolar,  
179 Lingual/Palatal, Supragingival (n = 18); and Incisor, Lingual/Palatal, Supragingival (n  
180 = 18). These groupings were then utilized to examine metadata associated with  
181 health, socio-cultural, and environmental factors that drive microbiota diversity using  
182 a PERMANOVA test (anosim) in QIIME with a cutoff of  $p = 0.05$  for significance. A  
183 G-test test was used to identify specific species that contributed to the differences  
184 observed in each metadata category with a cutoff of  $p = 0.05$  for significance. To  
185 ensure statistical tests were appropriate, a minimum of five samples per group was  
186 used when comparing two metadata categories, while a minimum of three samples  
187 per group was enforced when three or more metadata categories were compared.  
188 Samples without metadata for a certain category were excluded from those specific  
189 tests.

## 190 Results

### 191 *Robust oral microbiota recovered from historical London samples*

192 Across the nine archaeological sites included in this study, all samples were  
193 dominated by bacterial phyla typical of the modern and ancient human mouth,  
194 including Actinobacteria, Firmicutes, and Bacteroidetes (22,23) (Figure 2), consistent  
195 with recovery of an oral community structure in these samples. We then examined  
196 the impacts of contaminant DNA and laboratory methods on these data. To identify  
197 ancient calculus samples that lack true endogenous signal, we looked to identify a  
198 signal shared among negative controls that is representative of a laboratory  
199 environment. Bray-Curtis dissimilarities were calculated in MEGAN5 for the  
200 published ancient calculus control (n=1) (23) and negative controls sequenced within  
201 this study (n=10). Negative controls with Bray-Curtis dissimilarities for all negative  
202 controls were <0.6 from each other, indicating a consistent microbial signal present  
203 in the laboratory. Any calculus sample that fell within four times the mean standard  
204 deviation of this group was considered poorly preserved (*i.e.* largely consisted of  
205 laboratory contamination) and not fit for downstream analysis. Lastly, PERMANOVA  
206 tests indicated that there was no correlation between the microbial community  
207 structure of all samples and the date of sampling, DNA extraction, or library  
208 preparation (anosim;  $p > 0.01$ ; Table S2). Overall, 128 dental calculus samples from  
209 Medieval London appear to contain robust oral microbiota signatures and so were  
210 retained for downstream analysis.

211

### 212 *Oral geography accounts for some variation between individuals*

213 To examine if oral geography impacts the microbiota present in ancient dental  
214 calculus samples, we correlated oral microbial diversity in all ancient samples (n =  
215 128) with the oral sampling location. The tooth type was significantly correlated with  
216 the microbiota in each sample (anosim;  $p=0.0001$ ; Table S2). Tooth type was also  
217 the variable that explained the most variation on the PCoA plot calculated from Bray-  
218 Curtis values of all samples (Figure 3), accounting for 44.9 % of the variation in the  
219 data. We then controlled for tooth type by subsequently processing the samples from  
220 each tooth type independently. Within tooth types, we observed that tooth surface  
221 (buccal, lingual/palatal, interproximal) was a significant driver of diversity (anosim;  $p$   
222 < 0.01; Figure 4; Table S2), except for canines. In the canine data set, samples



223 correlated with lab extraction date and library ID (anosim;  $p = 0.0286$  and  $p = 0.0105$ ,  
224 respectively), indicating potential introduction of background laboratory contaminants  
225 during sample preparation. However, the canine data set also contained the fewest  
226 samples ( $n=14$ ), so this correlation may be associated with insufficient sampling  
227 depth. For stringency, canine samples were not included in further analysis. This  
228 highlights the need to record laboratory information for data processing. Lastly, we  
229 examined differences between sub- and supragingival microbiota, as differences  
230 between these sampling locations have been reported in modern populations (31).  
231 Unfortunately, there were very few samples of subgingival dental calculus in our  
232 study (5 of 128 samples; Table S1) limiting our ability to test this. However, to  
233 minimize any contributions from this potential bias, the five subgingival samples were  
234 removed from downstream analysis. Overall, these data indicate that oral geography  
235 can contribute to microbiota diversity within ancient calculus and needs to be  
236 controlled for in order to avoid introducing bias.

237

### 238 *Microbiota are correlated with disease*

239 We examined links between ancient oral microbiota and evidence of oral and  
240 systemic diseases, a wide-range of lifestyle factors, and temporal differences. First,  
241 we examined relationships between microbiota (supragingival dental calculus  
242 samples within three data sets: the lingual/palatal side of the molar ( $n=36$ ), premolar  
243 ( $n=18$ ), and incisor ( $n=18$ ) teeth) and sample metadata, including archaeological site,  
244 paleopathology, cultural factors, disease, and period (Table S1). There was no  
245 association between microbiota and archaeological site or time period (anosim;  $p=$   
246  $<0.01$ ; Tables S4-6), which have been assumed to be driving factors in previous  
247 aDNA studies (18,23). In addition, no metadata category significantly explained  
248 variation within the incisor group (anosim;  $p= <0.01$ ; Table S4). We also examined  
249 factors previously hypothesized to drive microbiota differences in ancient  
250 populations, including site location (18) and diet (14), and those modern studies  
251 indicate may be present in ancient populations, e.g. rural-urban status (32); none  
252 were found to be significant. However, disease factors were related to variation  
253 within the molar and premolar groups. Abscesses (oral disease;  $p = 0.0052$ ) and  
254 various bone pathologies (*i.e.* porosity, osteophytic lipping, and non-specific  
255 periostitis – examples of systemic disease;  $p = 0.0308 - 0.0466$ ) were all

256 significantly linked with microbiota variation within the molar data set (Table S6), and  
257 these correlations were investigated further.

258

### 259 *Oral disease associations with microbiota alteration*

260 The presence of abscesses within the oral cavity was correlated with  
261 microbiota within supragingival lingual/palatal dental calculus of molar teeth ( $p <$   
262  $0.0052$ ; Table S6). Therefore, we explored the microbial species linked to this oral  
263 disease. 30 bacterial species were increased in individuals with dental abscesses,  
264 while 20 species were decreased (G-test,  $p < 0.05$ ; Table S7). Notably, *Prevotella*  
265 and *Streptococcus* species, which are associated with dental abscesses in modern  
266 humans (33), were significantly increased in the ancient individuals with abscesses  
267 (178.0% and 330.0% of the mean read count in healthy individuals, respectively;  
268 Table S7). However, other species linked with abscess in modern populations, such  
269 as *Porphyromonas gingivalis* and *Treponema denticola* (34), were found to be  
270 significantly lower in ancient individuals with abscesses (51.0% and 62.2%,  
271 respectively). In addition, other potential microbes involved in abscess formation  
272 were not significantly different (e.g. *Clostridium*, *Fusobacterium*, and *Bacteroides*  
273 species). Individuals with dental abscesses also had significantly increased  
274 proportions of archaea, including *Methanobrevibacter* species, which are primary  
275 colonizers of the tooth surface (23) and are associated with severe periodontal  
276 disease in modern populations (35) (185.5%; Table S7). Together, this suggests that  
277 dental abscesses present in ancient Londoners were polymicrobial, similar to  
278 modern populations, and left unique signatures in ancient oral microbiota, including  
279 the presence of archaea.

280

### 281 *Relationships between bone pathologies and microbiota composition*

#### 282 Porosity and Osteophytic lipping

283 Observations of bone porosity indicate excessive opening of the pores in  
284 bone to allow blood, nerve, and other soft tissue to enter (36). This can be  
285 associated with age of the individual (37), as well as specific diseases such as  
286 anemia and rickets (38). Osteophytic lipping (outgrowths of bone) form around the  
287 joint surfaces and are often present alongside arthritis (39). Within our molar data  
288 set, all individuals with bone porosity ( $n = 9$ ) also had osteophytic lipping in joints,

289 while five additional individuals only had osteophytic lipping (Table S1).  
290 Consequently, taxonomic differences may not be specifically associated with either  
291 trait. Porosity was linked to an increase in 28 microbiota taxa and a decrease in 28  
292 taxa (G-test;  $p < 0.05$ ; Table S8). *Prevotella* and *Methanobrevibacter* species, which  
293 have previously been associated with bone diseases, such as arthritis (40), were  
294 increased in individuals with bone porosity. However, as with abscesses, species  
295 linked to oral inflammatory diseases and generally increased systemic inflammation,  
296 such as *Porphyromonas gingivalis*, *Treponema denticola*, and *Tannerella forsythia*  
297 (6,34), were decreased in individuals with bone porosity (24.6%, 72.3%, and 65.6%  
298 respectively). Osteophytic lipping was associated with an increase in 19 microbiota  
299 taxa (G-test;  $p < 0.05$ , Table S9). These taxa are similar to those increased with  
300 porosity; for example, *Prevotella* species and *Methanobrevibacter* species are also  
301 present in higher abundance in individuals with osteophytic lipping (145.7% and  
302 290.1%, respectively). Together, these data suggests that specific oral microbiota  
303 communities are found in ancient Londoners with joint disease.

304

#### 305 Periostitis

306 Periostitis is an inflammation of tissue surrounding the bone and often  
307 indicative of disease in the underlying bone (41). In living patients, it can be  
308 associated with various diseases (including syphilis and skin ulcers) and is linked  
309 with trauma (41). Within calculus samples from individuals with periostitis, *Prevotella*  
310 species and *Methanobrevibacter* species were again increased (147.8% and 217.7%  
311 respectively; Table S10), as observed with porosity and osteophytic lipping.

312 However, several unique bacterial species were linked with this disease, including  
313 *Capnocytophaga*, *Clostridia*, *Eubacterium*, *Firmicutes*, *Mogibacterium*, *Neisseria*,  
314 and *Pyramidobacter* (G-test;  $p < 0.05$ ; Table S10). This indicates that periostitis may  
315 be linked to a unique shift in the human microbiota, which is different to those  
316 observed for porosity and osteophytic lipping.

317

#### 318 Schmorl's nodes

319 In contrast to the molar samples, the microbiota of premolar teeth microbiota  
320 were correlated with Schmorl's nodes – a vertebral bone pathology (anosim;  $p =$   
321 0.05; Table S5). While Schmorl's nodes are common, their pathological status is  
322 poorly understood. It is thought that they appear in response to herniation of the

323 cartilaginous disc into the vertebral body as a result of direct physical stress (42,43)  
324 Methanobrevibacter was increased in individuals with the pathology (129.3%; Table  
325 S11). This is consistent with the previous pathologies examined. In contrast,  
326 Prevotella was decreased in those with Schmorl's Nodes (75.1%; Table S11). It is  
327 worth noting that while each of these bone pathologies is classified independently, it  
328 is possible that they have arisen from a similar cause, such as an increase in manual  
329 labor within this population (44). The lack of a specific causal factor for these  
330 paleopathology could explain why similar associations with the oral microbiota are  
331 inferred.

## 332 Discussion

333 In the largest ancient dental calculus study to date, we investigated the roles  
334 that experimental biases can play in ancient dental calculus research and revealed  
335 direct associations between ancient human oral and systemic health and the oral  
336 microbiota. We show that the oral geography of the mouth is a critical factor when  
337 identifying fine-scale factors that impact the human microbiota, as tooth type and  
338 tooth surface explained the greatest amount of variation observed in our data set.  
339 Once these and other technical factors are controlled, information that underpins the  
340 evolutionary history of the oral microbiota can be examined, highlighting the potential  
341 of dental calculus to study the impacts of cultural and environmental factors on the  
342 oral microbiota and, thus, the evolutionary history of the modern oral microbiota.

343 Within this study, the oral geography of dental calculus accounted for the  
344 most significant source of variation within the data, raising questions about  
345 conclusions drawn from previous ancient calculus research. Several studies have  
346 combined dental calculus samples from different regions within the mouth (22) or not  
347 factored in tooth type or tooth surface (23). Our study suggests that there are  
348 limitations to these approaches and that ancient dental calculus studies moving  
349 forward should account for tooth type and surface when examining correlations  
350 between individual metadata and oral microbiota. Even though it markedly reduced  
351 the total sample size per group, intrapersonal variation largely masked many of the  
352 links between disease and microbiota. Notably, different sampling locations within  
353 the mouth also revealed individual associations with skeletal metadata. While limited  
354 sample numbers in some tooth groupings may affect these findings, oral microbial  
355 communities from different teeth appear to respond differently in states of disease. In  
356 future, a study of the oral geography within single ancient individuals, improved  
357 bioinformatic methodologies, and increased sample sizes will help understand and  
358 account for intrapersonal variation.

359 This study also highlights additional technical factors that may influence  
360 ancient oral microbiota diversity, including contamination and experimental  
361 metadata. To address potential laboratory contamination, we compared samples to  
362 negative blank controls to confirm that samples did not have a microbial signal  
363 consistent with the laboratory environment. Conservatively, any microbial species in  
364 common with the negative controls was also removed from the samples. Samples

365 were also randomized before undergoing laboratory protocols. This demonstrates  
366 the care with which ancient microbiota data must be handled, as researchers must  
367 be careful to collect, document, and analyse sampling and experimental metadata to  
368 accurately interpret findings in ancient microbiota. In future studies, the collection of  
369 detailed metadata will improve the identification of local cultural and environmental  
370 factors that influenced the microbiota, and scientists will be better able to identify  
371 potential links between oral microbiota and a past individual's life history.

372 This is the first study to examine ancient oral microbiota variation with respect  
373 to a wide-range of individualistic metadata, including sex, age, rural-urban status,  
374 religion, time, and location. Despite this wealth of information, this study revealed  
375 that disease appears to be the single largest determinant of oral microbiota variation  
376 in ancient London. We identified alterations in community structure associated with  
377 both oral and systemic disease. In modern populations, oral microbiota have been  
378 linked to a wide range of oral and systemic diseases, as diverse as dental caries,  
379 gum disease, arthritis, heart disease, pre-term birth, Alzheimer's disease, and mental  
380 disorders (5,6,9,34,45). Although past aDNA studies have identified ancient oral  
381 pathogens as potential signatures of disease (18,21,22), we identify community level  
382 changes linked to abscesses that include both known, abscess-associated  
383 pathogens (*Prevotella* and *Streptococcus* species) and lesser known species  
384 (*Methanobrevibacter* species). In addition, microbiota from molar teeth correlated  
385 with bone disease, such as porosity, osteophytic lipping and peristitis and, in all  
386 cases, were demarcated by an increase in oral *Prevotella* species. In modern  
387 populations, *Prevotella* species are associated with arthritis (6), although the  
388 mechanism underlying this link is not yet known. There may be a direct link between  
389 this species and Porosity, Osteophytic Lipping, and Periostitis because oral  
390 bacteria can escape the mouth and cause inflammation and lesions elsewhere in the  
391 body (46). Alternatively, *Prevotella* species or community structure may serve as an  
392 oral marker for overall community alterations that are linked to generalized  
393 inflammation in the body. Consequently, causation cannot be inferred, and further  
394 studies are needed to investigate mechanistic relationships.

395 Bone diseases linked to greater physical stress and malnutrition are typically  
396 seen in ancient individuals with low socio-economic rank (47). In London, low socio-  
397 economic status has been previously associated with poor bone health (47). While it  
398 is possible that these bone diseases directly led to alterations in microbiota, it is also

399 possible that these relationships between disease and microbiota are explained by  
400 greater lifestyle factors, such as low socioeconomic status. In fact, several studies to  
401 date have linked socioeconomic status to microbiota community composition (48–  
402 50). Our results are consistent with these observations, and may suggest that oral  
403 microbiota can be used as a marker for socioeconomic status in the past. Further  
404 research is needed to investigate this trend in different human cultures worldwide.

405         Large-scale sampling of ancient dental calculus from a single population has  
406 provided an unprecedented opportunity to reveal information about how past  
407 lifestyles shape the future of human health. This study reveals the impacts of  
408 technical factors and highlights how critical disease was in the past for shaping the  
409 evolutionary history of human oral microbiota. In addition, this study provides  
410 fundamental baseline evidence to suggest that the oral microbiota can be used as  
411 archaeological biomarkers of cultural, health, and environmental change, allowing  
412 researchers to gain new and more detailed insights when other archaeological  
413 information is unavailable.

414 **Competing Interests**

415 The authors declare no competing interests.



## 416 Author's Contributions

417 AGF, JB, RR, AC, KD and LSW contributed to study design. AGF, JB, and RR  
418 submitted destructive sampling applications, collated metadata, and collected  
419 samples. AGF conducted laboratory work and bioinformatic analysis. AGF, NG, KD,  
420 AC, and LSW contributed to data interpretation. AGF and LSW outlined and wrote  
421 the manuscript, and KD, AC, and LSW edited the manuscript.

## 422 Acknowledgements

423 We would like to thank the Museum of London for allowing us to collect and  
424 destructively analyse ancient dental calculus samples from the specimens utilized in  
425 this study.

426 **Funding**

427 This project was funded by a L. F. and D. Denholm Scholarship to A.G.F. (2014) and  
428 an Australian Research Council Discovery Early Career Researcher Fellowship  
429 awarded to L.S.W. (DE150101574).

## 430 References

- 431 1. Rosenbaum M, Knight R, Leibel RL. The gut microbiota in human energy  
432 homeostasis and obesity. *Trends Endocrinol Metab.* 2015 Sep;26(9):493–501.
- 433 2. Trivedi B. Microbiome: The surface brigade. *Nature.* 2012;492(7429):2.
- 434 3. Li X, Wang J, Joiner A, Chang J. The remineralisation of enamel: a review of the  
435 literature. *J Dent.* 2014 Jun;42, Supplement 1:S12–20.
- 436 4. Iwase T, Uehara Y, Shinji H, Tajima A, Seo H, Takada K, et al. *Staphylococcus*  
437 *epidermidis* Esp inhibits *Staphylococcus aureus* biofilm formation and nasal  
438 colonization. *Nature.* 2010 May 20;465(7296):346–9.
- 439 5. Noverr MC, Huffnagle GB. Does the microbiota regulate immune responses  
440 outside the gut? *Trends Microbiol.* 2004 Dec;12(12):562–8.
- 441 6. Rautemaa R, Lauhio A, Cullinan MP, Seymour GJ. Oral infections and systemic  
442 disease—an emerging problem in medicine. *Clin Microbiol Infect.* 2007 Nov  
443 1;13(11):1041–7.
- 444 7. Weyrich LS, Feaga HA, Park J, Muse SJ, Safi CY, Rolin OY, et al. Resident  
445 Microbiota Affect *Bordetella pertussis* Infectious Dose and Host Specificity. *J*  
446 *Infect Dis* [Internet]. 2013 Dec 15; Available from:  
447 <http://www.ncbi.nlm.nih.gov/pubmed/24227794>
- 448 8. Farrell JJ, Zhang L, Zhou H, Chia D, Elashoff D, Akin D, et al. Variations of oral  
449 microbiota are associated with pancreatic diseases including pancreatic cancer.  
450 *Gut.* 2012 Apr 1;61(4):582–8.
- 451 9. Grau AJ, Becher H, Ziegler CM, Lichy C, Buggle F, Kaiser C, et al. Periodontal  
452 Disease as a Risk Factor for Ischemic Stroke. *Stroke.* 2004 Feb 1;35(2):496–  
453 501.
- 454 10. Turnbaugh PJ, Ley RE, Mahowald MA, Magrini V, Mardis ER, Gordon JI. An  
455 obesity-associated gut microbiome with increased capacity for energy harvest.  
456 *Nature.* 2006 Dec 21;444(7122):1027–31.
- 457 11. David LA, Maurice CF, Carmody RN, Gootenberg DB, Button JE, Wolfe BE,  
458 et al. Diet rapidly and reproducibly alters the human gut microbiome. *Nature.*  
459 2014 Jan 23;505(7484):559–63.
- 460 12. Chen YE, Tsao H. The skin microbiome: Current perspectives and future  
461 challenges. *J Am Acad Dermatol.* 2013 Jul;69(1):143-155.e3.
- 462 13. Lax S, Smith DP, Hampton-Marcell J, Owens SM, Handley KM, Scott NM, et  
463 al. Longitudinal analysis of microbial interaction between humans and the indoor  
464 environment. *Science.* 2014 Aug 29;345(6200):1048–52.
- 465 14. Weyrich LS, Dobney K, Cooper A. Ancient DNA analysis of dental calculus. *J*  
466 *Hum Evol.* 2015 Feb;79:119–24.

- 467 15. Weyrich LS. Evolution of the Human Microbiome and Impacts on Human  
468 Health, Infectious Disease, and Hominid Evolution. In: Gontier N, editor.  
469 Reticulate Evolution [Internet]. Springer International Publishing; 2015 [cited  
470 2015 Oct 27]. p. 231–53. (Interdisciplinary Evolution Research). Available from:  
471 [http://link.springer.com/chapter/10.1007/978-3-319-16345-1\\_9](http://link.springer.com/chapter/10.1007/978-3-319-16345-1_9)
- 472 16. Warinner C, Speller C, Collins MJ. A new era in palaeomicrobiology:  
473 prospects for ancient dental calculus as a long-term record of the human oral  
474 microbiome. *Phil Trans R Soc B*. 2015 Jan 19;370(1660):20130376.
- 475 17. Warinner C, Speller C, Collins MJ, Lewis Jr. CM. Ancient human  
476 microbiomes. *J Hum Evol*. 2015 Feb;79:125–36.
- 477 18. Adler CJ, Dobney K, Weyrich LS, Kaidonis J, Walker AW, Haak W, et al.  
478 Sequencing ancient calcified dental plaque shows changes in oral microbiota  
479 with dietary shifts of the Neolithic and Industrial revolutions. *Nat Genet*. 2013  
480 Apr;45(4):450–5.
- 481 19. White DJ. Processes contributing to the formation of dental calculus.  
482 *Biofouling*. 1991 Aug 1;4(1–3):209–18.
- 483 20. Dobney K, Brothwell D. Dental Calculus: Its Relevance to Ancient Diet and  
484 Oral Ecology. In: Cruwys E, Foley RA, editors. *Teeth and Anthropology*. 1986. p.  
485 55–81. (British Archaeological Reports).
- 486 21. De La Fuente C, Flores S, Moraga M. DNA from Human Ancient Bacteria: A  
487 Novel Source of Genetic Evidence from Archaeological Dental Calculus.  
488 *Archaeometry*. 2013;55(4):767–78.
- 489 22. Warinner C, Rodrigues JFM, Vyas R, Trachsel C, Shved N, Grossmann J, et  
490 al. Pathogens and host immunity in the ancient human oral cavity. *Nat Genet*.  
491 2014;
- 492 23. Weyrich LS, Duchane S, Soubrier J, Arriola L, Llamas B, Breen J, et al.  
493 Reconstructing Neandertal behavior, diet, and disease using ancient DNA from  
494 dental calculus. *Nature*. 2016;
- 495 24. Simón-Soro Á, Tomás I, Cabrera-Rubio R, Catalan MD, Nyvad B, Mira A.  
496 Microbial Geography of the Oral Cavity. *J Dent Res*. 2013 Jul 1;92(7):616–21.
- 497 25. Salter SJ, Cox MJ, Turek EM, Calus ST, Cookson WO, Moffatt MF, et al.  
498 Reagent and laboratory contamination can critically impact sequence-based  
499 microbiome analyses. *BMC Biol*. 2014 Nov 12;12(1):87.
- 500 26. Meyer M, Kircher M. Illumina Sequencing Library Preparation for Highly  
501 Multiplexed Target Capture and Sequencing. *Cold Spring Harb Protoc*. 2010 Jun  
502 1;2010(6):pdb.prot5448.
- 503 27. Lindgreen S. AdapterRemoval: easy cleaning of next-generation sequencing  
504 reads. *BMC Res Notes*. 2012;5:337.

- 505 28. Herbig A, Maixner F, Bos KI, Zink A, Krause J, Huson DH. MALT: Fast  
506 alignment and analysis of metagenomic DNA sequence data applied to the  
507 Tyrolean Iceman. *bioRxiv*. 2016 Apr 27;050559.
- 508 29. Huson DH, Auch AF, Qi J, Schuster SC. MEGAN analysis of metagenomic  
509 data. *Genome Res*. 2007 Mar 1;17(3):377–86.
- 510 30. Caporaso JG, Kuczynski J, Stombaugh J, Bittinger K, Bushman FD, Costello  
511 EK, et al. QIIME allows analysis of high-throughput community sequencing data.  
512 *Nat Methods*. 2010 May;7(5):335–6.
- 513 31. Zijngje V, Leeuwen MBM van, Degener JE, Abbas F, Thurnheer T, Gmür R, et  
514 al. Oral Biofilm Architecture on Natural Teeth. *PLOS ONE*. 2010 Feb  
515 24;5(2):e9321.
- 516 32. Ayeni FA, Biagi E, Rampelli S, Fiori J, Soverini M, Audu HJ, et al. Infant and  
517 Adult Gut Microbiome and Metabolome in Rural Bassa and Urban Settlers from  
518 Nigeria. *Cell Rep*. 2018 Jun 5;23(10):3056–67.
- 519 33. Shweta, Prakash SK. Dental abscess: A microbiological review. *Dent Res J*.  
520 2013;10(5):585–91.
- 521 34. Rocas IN, Siqueira JF Jr, Santos KR, Coelho AM. “Red complex”  
522 (*Bacteroides forsythus*, *Porphyromonas gingivalis*, and *Treponema denticola*) in  
523 endodontic infections: a molecular approach. *Oral Surg Oral Med Oral Pathol*  
524 *Oral Radiol Endod*. 2001 Apr;91(4):468–71.
- 525 35. Horz H-P, Conrads G. Methanogenic Archaea and oral infections — ways to  
526 unravel the black box. *J Oral Microbiol [Internet]*. 2011 Feb 23 [cited 2016 Feb  
527 17];3. Available from: <http://www.ncbi.nlm.nih.gov/pmc/articles/PMC3086593/>
- 528 36. Cardoso L, Fritton SP, Gailani G, Benalla M, Cowin SC. Advances in  
529 assessment of bone porosity, permeability and interstitial fluid flow. *J Biomech*.  
530 2013 Jan 18;46(2):253–65.
- 531 37. Gabet Y, Bab I. Microarchitectural Changes in the Aging Skeleton. *Curr*  
532 *Osteoporos Rep*. 2011 Sep 8;9(4):177.
- 533 38. Pinhasi R, Mays S. *Advances in Human Palaeopathology*. John Wiley &  
534 Sons; 2008. 410 p.
- 535 39. Ak J. Osteophytes and the osteoarthritic femoral head. *J Bone Joint Surg Br*.  
536 1975 1975;57(3):314–24.
- 537 40. Scher JU, Abramson SB. The microbiome and rheumatoid arthritis. *Nat Rev*  
538 *Rheumatol*. 2011 Aug 23;7(10):569–78.
- 539 41. Ortner DJ. *Identification of Pathological Conditions in Human Skeletal*  
540 *Remains*. Academic Press; 2003. 663 p.
- 541 42. Kyere KA, Than KD, Wang AC, Rahman SU, Valdivia-Valdivia JM, Marca FL,  
542 et al. Schmorl’s nodes. *Eur Spine J*. 2012 Apr 28;21(11):2115–21.

- 543 43. Sonne-Holm S, Jacobsen S, Rosing H, Monrad H. The epidemiology of  
544 Schmorl's nodes and their correlation to radiographic degeneration in 4,151  
545 subjects. *Eur Spine J.* 2013 Mar 16;22(8):1907–12.
- 546 44. Black J. London: a history. Carnegie; 2009.
- 547 45. Selwitz RH, Ismail AI, Pitts NB. Dental caries. *The Lancet.* 2007 Jan  
548 12;369(9555):51–9.
- 549 46. Billing F. Focal Infection: Its broader application in the etiology of general  
550 disease. *J Am Med Assoc.* 1914;63(11):5.
- 551 47. Newman SL, Gowland RL. Dedicated Followers of Fashion?  
552 Bioarchaeological Perspectives on Socio-Economic Status, Inequality, and  
553 Health in Urban Children from the Industrial Revolution (18th–19th C), England.  
554 *Int J Osteoarchaeol.* 2017 Mar 1;27(2):217–29.
- 555 48. Kau AL, Ahern PP, Griffin NW, Goodman AL, Gordon JI. Human nutrition, the  
556 gut microbiome and the immune system. *Nature.* 2011 Jun;474(7351):327–36.
- 557 49. Belstrøm D, Holmstrup P, Nielsen CH, Kirkby N, Twetman S, Heitmann BL, et  
558 al. Bacterial profiles of saliva in relation to diet, lifestyle factors, and  
559 socioeconomic status. *J Oral Microbiol.* 2014 Jan 1;6(1):23609.
- 560 50. Miller GE, Engen PA, Gillevet PM, Shaikh M, Sikaroodi M, Forsyth CB, et al.  
561 Lower Neighborhood Socioeconomic Status Associated with Reduced Diversity  
562 of the Colonic Microbiota in Healthy Adults. *PLOS ONE.* 2016 Feb  
563 9;11(2):e0148952.

564 Figure and Table Legends

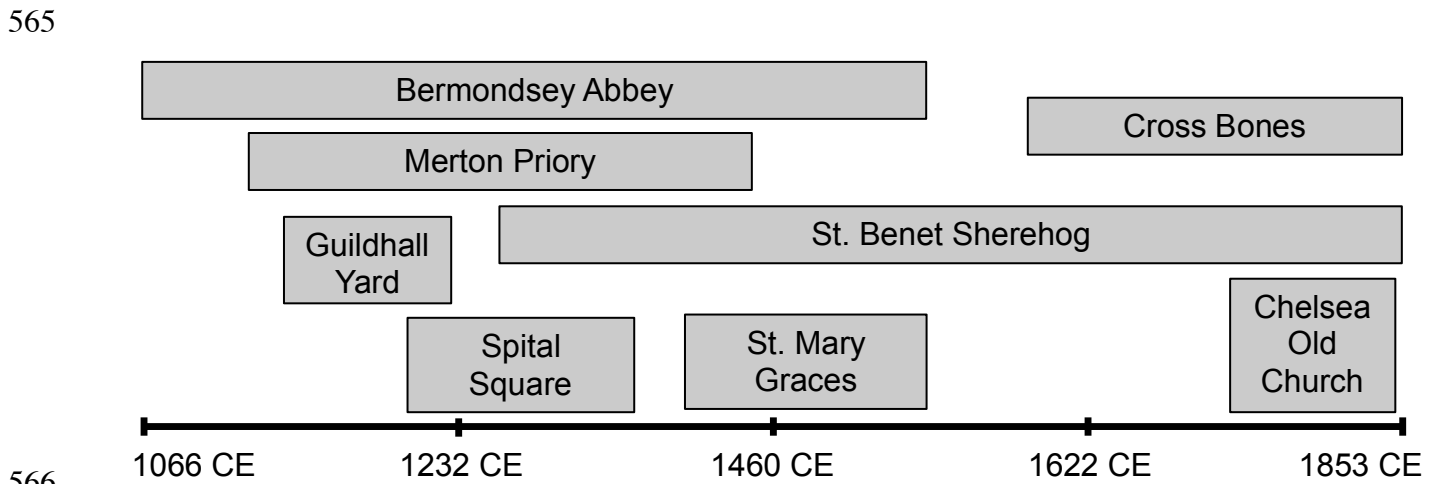

**Figure 1:** The eight archaeological sites included in this study and the length of time each site was actively used for burials. Samples throughout each of these periods are included in this study.



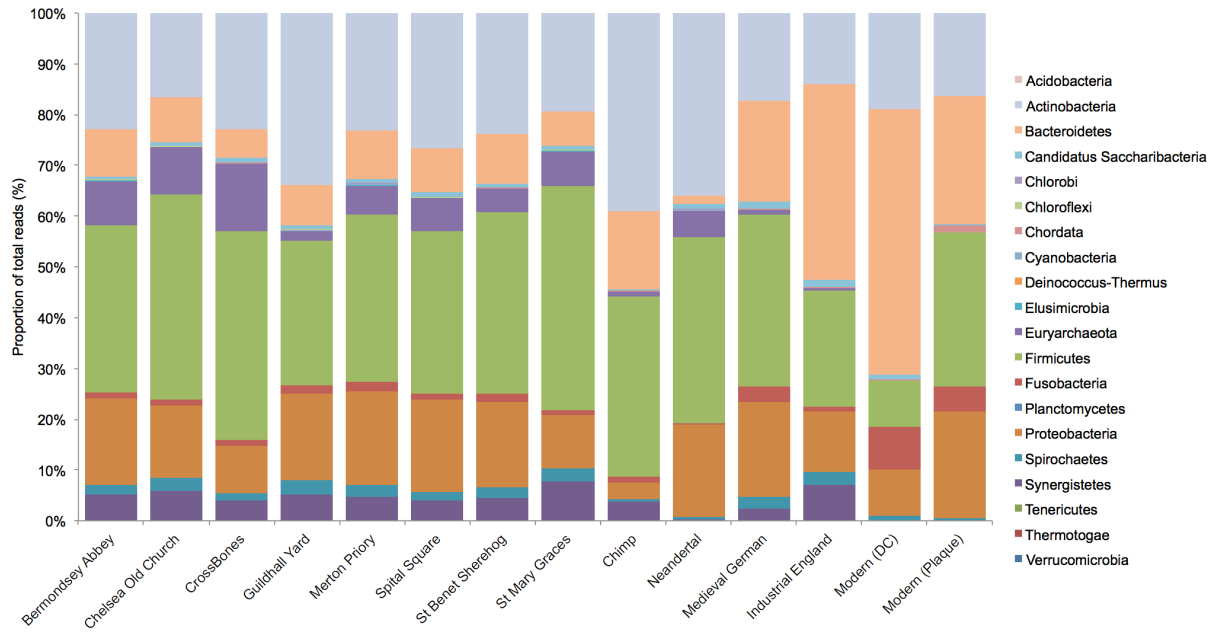

570  
571  
572  
573  
574

**Figure 2:** Stacked bar chart showing Museum of London samples (grouped by archaeological site) and previously analysed samples from Weyrich *et al.* (2017) and Warinner *et al.* (2014) and modern plaque from Belda-Ferre, P. *et al.* (2012)

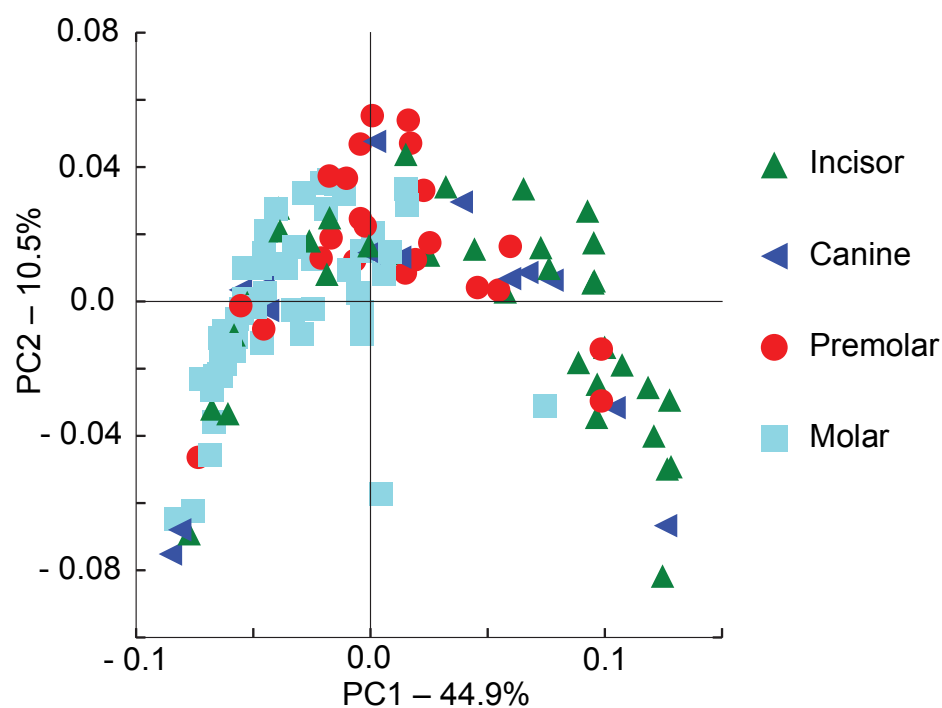

575

576 **Figure 2:** PCoA plot of Bray-Curtis dissimilarity for all dental calculus samples (n =  
577 128). Individual samples are labeled by tooth type. The first axis (PC1) indicates the  
578 separation of tooth types, notably molar and incisor.

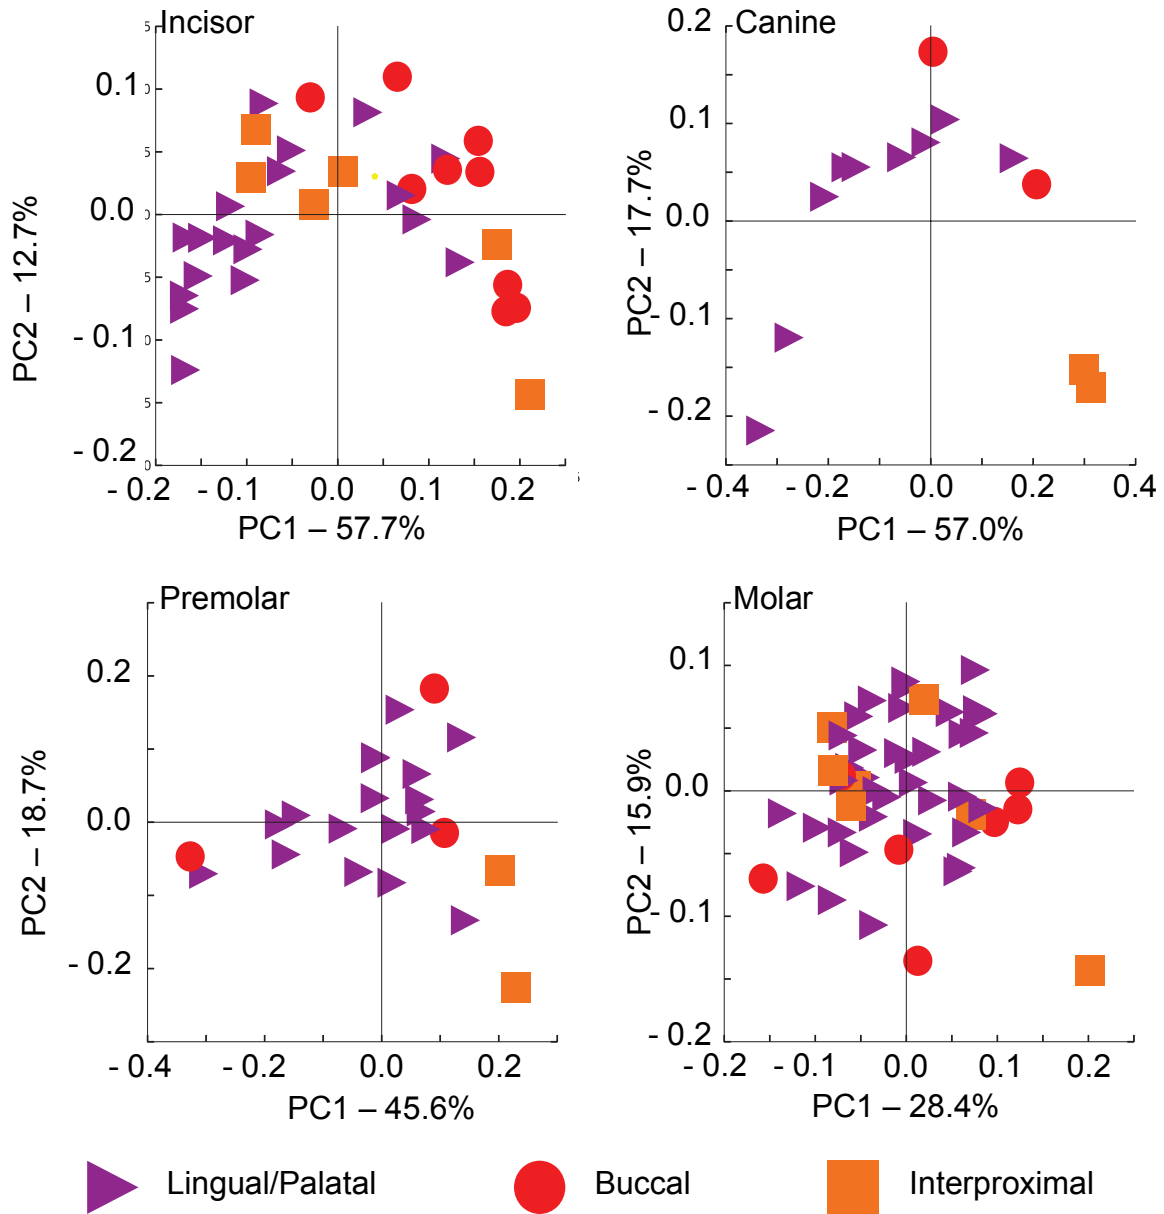

579

580

581

582

**Figure 3:** PCoA plot of Bray-Curtis dissimilarity for all dental calculus samples divided by tooth type. Individual samples are coded by the tooth surface from which the sample was taken.
